# Supplementary material for: Perceived Barriers and Facilitators to Psychotherapy Utilisation and How They Relate to Patient’s Psychotherapeutic Goals
Source: MDPI journal article supplement (doi:10.3390/healthcare10112228), 2022-11-07
Supplement: s1 [file s1]

## Supplement to 3.2.

### 3.2.1.

|    |    | 3_External Barrie... | 4_Internal Barrier... | 5_External Facilit...          | 6_Internal Facilit... | 7_Goals       | Totals       |
|----|----|----------------------|-----------------------|--------------------------------|-----------------------|---------------|--------------|
|    |    | ◇ 20 49              | ◇ 20 57               | ◇ 23 113                       | ◇ 24 129              | ◇ 13 86       |              |
| 1  | 46 | 1<br>4.17 %          | 3<br>12.50 %          | 11<br>45.83 %                  | 4<br>16.67 %          | 5<br>20.83 %  | 24<br>100 %  |
| 2  | 39 | 6<br>33.33 %         |                       | 2<br>11.11 %                   | 8<br>44.44 %          | 2<br>11.11 %  | 18<br>100 %  |
| 3  | 55 |                      | 9<br>31.03 %          | 16<br>55.17 %                  | 3<br>10.34 %          | 1<br>3.45 %   | 29<br>100 %  |
| 4  | 55 | 1<br>3.57 %          | 3<br>10.71 %          | 12<br>42.86 %                  | 8<br>28.57 %          | 4<br>14.29 %  | 28<br>100 %  |
| 5  | 27 | 2<br>18.18 %         |                       | 2<br>18.18 %                   | 4<br>36.36 %          | 3<br>27.27 %  | 11<br>100 %  |
| 6  | 37 |                      | 7<br>36.84 %          | 5<br>26.32 %                   | 6<br>31.58 %          | 1<br>5.26 %   | 19<br>100 %  |
| 7  | 41 | 3<br>13.04 %         |                       | 5<br>21.74 %                   | 10<br>43.48 %         | 5<br>21.74 %  | 23<br>100 %  |
| 8  | 42 | 3<br>13.64 %         | 3<br>13.64 %          | 3<br>13.64 %                   | 7<br>31.82 %          | 6<br>27.27 %  | 22<br>100 %  |
| 9  | 40 | 1<br>4.76 %          | 4<br>19.05 %          | 1<br>4.76 %                    | 10<br>47.62 %         | 5<br>23.81 %  | 21<br>100 %  |
| 10 | 47 | 2<br>7.14 %          | 3<br>10.71 %          | 5<br>17.86 %                   | 10<br>35.71 %         | 8<br>28.57 %  | 28<br>100 %  |
| 11 | 30 |                      |                       | 4<br>33.33 %                   | 4<br>33.33 %          | 4<br>33.33 %  | 12<br>100 %  |
| 12 | 34 | 2<br>12.50 %         | 2<br>12.50 %          | 5<br>31.25 %                   | 3<br>18.75 %          | 4<br>25.00 %  | 16<br>100 %  |
| 13 | 37 |                      | 2<br>13.33 %          | 2<br>13.33 %                   | 5<br>33.33 %          | 6<br>40.00 %  | 15<br>100 %  |
| 14 | 36 |                      | 3<br>20.00 %          | 3<br>20.00 %                   | 4<br>26.67 %          | 5<br>33.33 %  | 15<br>100 %  |
| 15 | 42 | 7<br>31.82 %         |                       | 5<br>22.73 %                   | 6<br>27.27 %          | 4<br>18.18 %  | 22<br>100 %  |
| 16 | 38 | 4<br>22.22 %         |                       | 5<br>27.78 %                   | 4<br>22.22 %          | 5<br>27.78 %  | 18<br>100 %  |
| 17 | 51 | 5<br>18.52 %         | 5<br>18.52 %          | 4<br>14.81 %                   | 9<br>33.33 %          | 4<br>14.81 %  | 27<br>100 %  |
| 18 | 31 | 3<br>23.08 %         |                       | 2<br>15.38 %                   | 4<br>30.77 %          | 4<br>30.77 %  | 13<br>100 %  |
| 19 | 50 | 2<br>6.45 %          | 9<br>29.03 %          | 10<br>32.26 %                  | 4<br>12.90 %          | 6<br>19.35 %  | 31<br>100 %  |
| 20 | 48 | 4<br>13.79 %         | 3<br>10.34 %          | 9<br>31.03 %                   | 11<br>37.93 %         | 2<br>6.90 %   | 29<br>100 %  |
| 21 | 37 | 3<br>23.08 %         | 1<br>7.69 %           | 2<br>15.38 %                   | 5<br>38.46 %          | 2<br>15.38 %  | 13<br>100 %  |
|    |    | 49<br>11.29 %        | 57<br>13.13 %         | 113<br>26.04 %                 | 129<br>29.72 %        | 86<br>19.82 % | 434<br>100 % |
|    |    | □ = number of cases  | ◇ = number of codes   | ⊙ = number of coded quotations |                       |               |              |

**Cross-Table S1.** underlying the Distribution of Barriers, Facilitators and Therapeutic Goals per Case

### 3.2.2.

|    |      | 3_External Barrie...                   | 4_Internal Barrier... | 5_External Facilit... | 6_Internal Facilit... | 7_Goals       | Totals       |
|----|------|----------------------------------------|-----------------------|-----------------------|-----------------------|---------------|--------------|
|    |      | ◇ 20 ④ 49                              | ◇ 20 ④ 57             | ◇ 23 ④ 113            | ◇ 24 ④ 129            | ◇ 13 ④ 86     |              |
| 1  | ④ 46 | 1<br>4.17 %                            | 3<br>12.50 %          | 11<br>45.83 %         | 4<br>16.67 %          | 5<br>20.83 %  | 24<br>100 %  |
| 5  | ④ 27 | 2<br>18.18 %                           |                       | 2<br>18.18 %          | 4<br>36.36 %          | 3<br>27.27 %  | 11<br>100 %  |
| 7  | ④ 41 | 3<br>13.04 %                           |                       | 5<br>21.74 %          | 10<br>43.48 %         | 5<br>21.74 %  | 23<br>100 %  |
| 8  | ④ 42 | 3<br>13.64 %                           | 3<br>13.64 %          | 3<br>13.64 %          | 7<br>31.82 %          | 6<br>27.27 %  | 22<br>100 %  |
| 9  | ④ 40 | 1<br>4.76 %                            | 4<br>19.05 %          | 1<br>4.76 %           | 10<br>47.62 %         | 5<br>23.81 %  | 21<br>100 %  |
| 10 | ④ 47 | 2<br>7.14 %                            | 3<br>10.71 %          | 5<br>17.86 %          | 10<br>35.71 %         | 8<br>28.57 %  | 28<br>100 %  |
| 11 | ④ 30 |                                        |                       | 4<br>33.33 %          | 4<br>33.33 %          | 4<br>33.33 %  | 12<br>100 %  |
| 12 | ④ 34 | 2<br>12.50 %                           | 2<br>12.50 %          | 5<br>31.25 %          | 3<br>18.75 %          | 4<br>25.00 %  | 16<br>100 %  |
| 13 | ④ 37 |                                        | 2<br>13.33 %          | 2<br>13.33 %          | 5<br>33.33 %          | 6<br>40.00 %  | 15<br>100 %  |
| 14 | ④ 36 |                                        | 3<br>20.00 %          | 3<br>20.00 %          | 4<br>26.67 %          | 5<br>33.33 %  | 15<br>100 %  |
| 16 | ④ 38 | 4<br>22.22 %                           |                       | 5<br>27.78 %          | 4<br>22.22 %          | 5<br>27.78 %  | 18<br>100 %  |
| 18 | ④ 31 | 3<br>23.08 %                           |                       | 2<br>15.38 %          | 4<br>30.77 %          | 4<br>30.77 %  | 13<br>100 %  |
|    |      | 21<br>3 External Barriers to Treatment | 20                    | 48<br>22.02 %         | 69<br>31.65 %         | 60<br>27.52 % | 218<br>100 % |

= number of cases   
 = number of codes   
 = number of coded quotations

**Cross-Table S2.** underlying the High-Goal Type Cases

|    |      | 3_External Barrie... | 4_Internal Barrier... | 5_External Facilit... | 6_Internal Facilit... | 7_Goals       | Totals       |
|----|------|----------------------|-----------------------|-----------------------|-----------------------|---------------|--------------|
|    |      | ◇ 20 ④ 49            | ◇ 20 ④ 57             | ◇ 23 ④ 113            | ◇ 24 ④ 129            | ◇ 13 ④ 86     |              |
| 2  | ④ 39 | 6<br>33.33 %         |                       | 2<br>11.11 %          | 8<br>44.44 %          | 2<br>11.11 %  | 18<br>100 %  |
| 3  | ④ 55 |                      | 9<br>31.03 %          | 16<br>55.17 %         | 3<br>10.34 %          | 1<br>3.45 %   | 29<br>100 %  |
| 4  | ④ 55 | 1<br>3.57 %          | 3<br>10.71 %          | 12<br>42.86 %         | 8<br>28.57 %          | 4<br>14.29 %  | 28<br>100 %  |
| 6  | ④ 37 |                      | 7<br>36.84 %          | 5<br>26.32 %          | 6<br>31.58 %          | 1<br>5.26 %   | 19<br>100 %  |
| 15 | ④ 42 | 7<br>31.82 %         |                       | 5<br>22.73 %          | 6<br>27.27 %          | 4<br>18.18 %  | 22<br>100 %  |
| 17 | ④ 51 | 5<br>18.52 %         | 5<br>18.52 %          | 4<br>14.81 %          | 9<br>33.33 %          | 4<br>14.81 %  | 27<br>100 %  |
| 19 | ④ 50 | 2<br>6.45 %          | 9<br>29.03 %          | 10<br>32.26 %         | 4<br>12.90 %          | 6<br>19.35 %  | 31<br>100 %  |
| 20 | ④ 48 | 4<br>13.79 %         | 3<br>10.34 %          | 9<br>31.03 %          | 11<br>37.93 %         | 2<br>6.90 %   | 29<br>100 %  |
| 21 | ④ 37 | 3<br>23.08 %         | 1<br>7.69 %           | 2<br>15.38 %          | 5<br>38.46 %          | 2<br>15.38 %  | 13<br>100 %  |
|    |      | 28<br>12.96 %        | 37<br>17.13 %         | 65<br>30.09 %         | 60<br>27.78 %         | 26<br>12.04 % | 216<br>100 % |

= number of cases   
 = number of codes   
 = number of coded quotations

**Cross-Table S3.** underlying the Low-Goal Type Cases

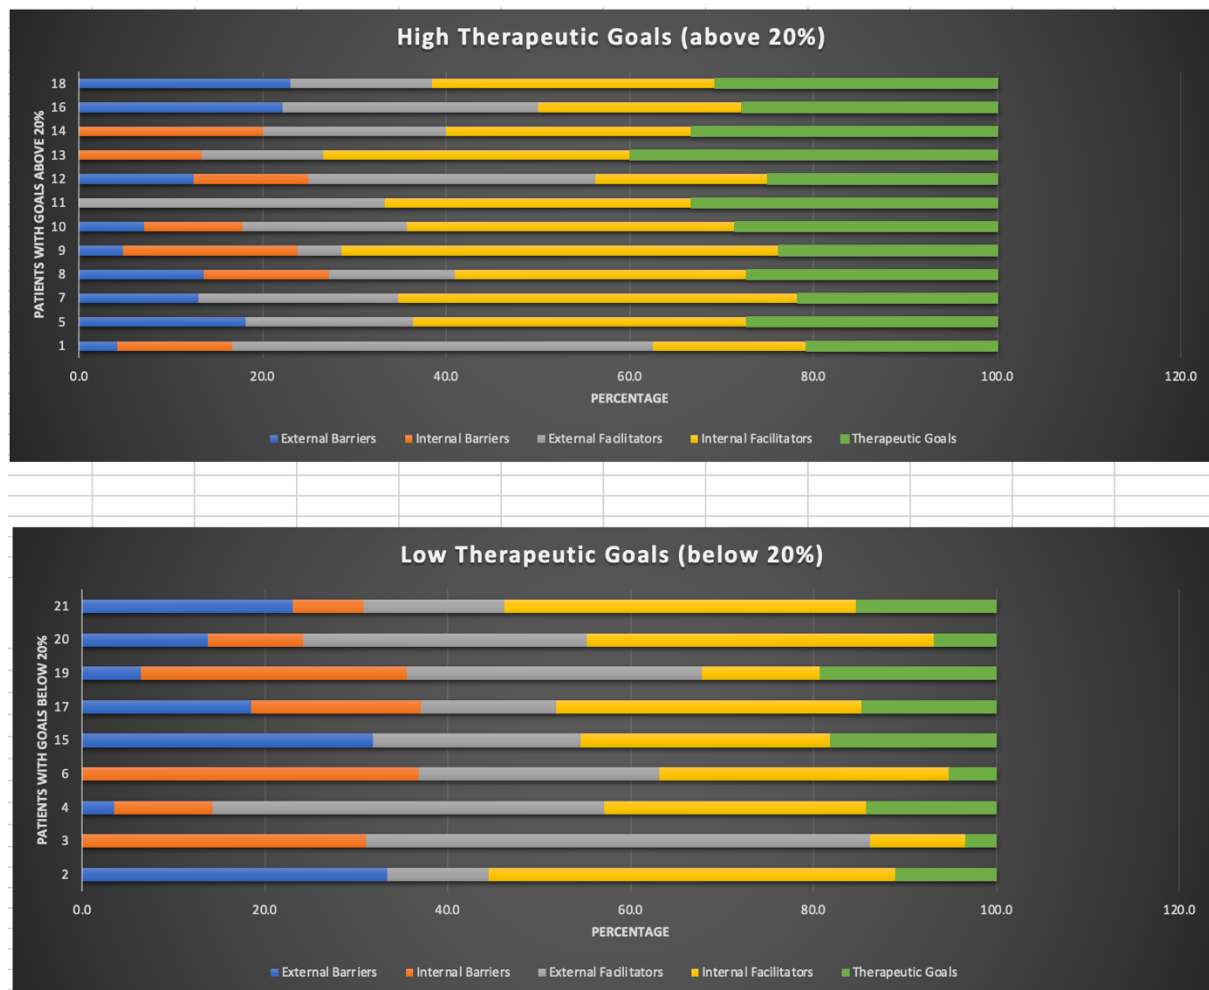

**Visualisation S4.** Visualised comparison of high-goal-type cases and low-goal-type cases

|                                  |        | 5_High Goal Group | 5_Low Goal Group | Totals         |
|----------------------------------|--------|-------------------|------------------|----------------|
|                                  |        | 12 449            | 9 414            |                |
| 3_External Barriers to Treatment | 20 49  | 21<br>9.63 %      | 28<br>12.96 %    | 49<br>11.29 %  |
| 4_Internal Barriers to Treatment | 20 57  | 20<br>9.17 %      | 37<br>17.13 %    | 57<br>13.13 %  |
| 5_External Facilitators          | 23 113 | 48<br>22.02 %     | 65<br>30.09 %    | 113<br>26.04 % |
| 6_Internal Facilitators          | 24 129 | 69<br>31.65 %     | 60<br>27.78 %    | 129<br>29.72 % |
| 7_Goals                          | 13 86  | 60<br>27.52 %     | 26<br>12.04 %    | 86<br>19.82 %  |
| Totals                           |        | 218<br>100 %      | 216<br>100 %     | 434<br>100 %   |

 = number of cases
  = number of codes
  = number of coded quotations

**Cross-Table S5.** underlying Distribution of Barriers, Facilitators and Therapeutic Goals per Group
